# Supplementary material for: Rapid microwave synthesis of medium and high entropy oxides for outstanding oxygen evolution reaction performance
Source: Royal Society of Chemistry journal article supplement (doi:10.1039/d4ma00667d), 2024-01-01
Supplement: d4ma00667d1.pdf [file d4ma00667d1.pdf]

## 1 Supplementary data

### 2 OER responses of all prepared HEO-modified GC electrode

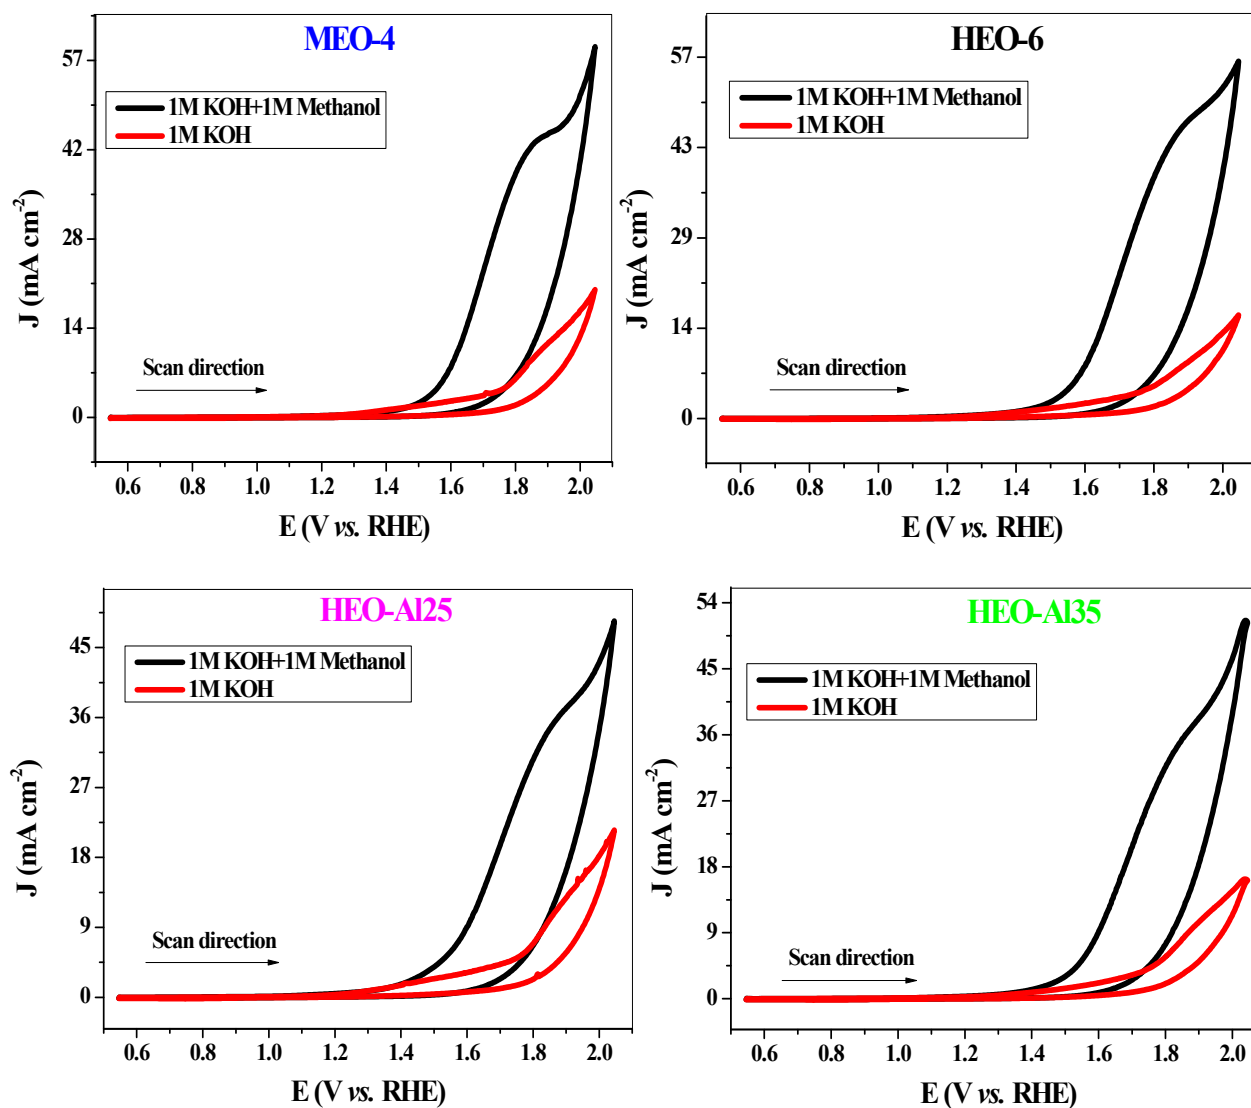

**Figure S1.** CV responses of all prepared materials in the absence (red) and presence (black) of methanol.

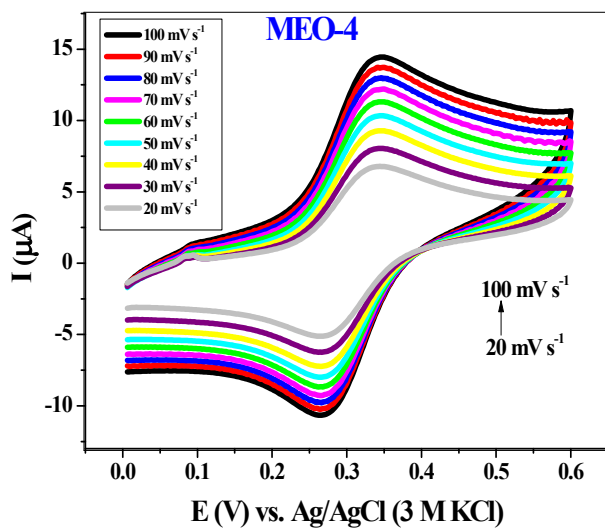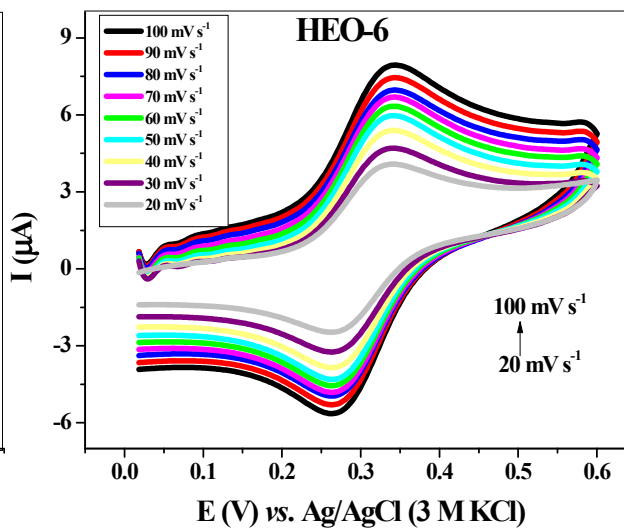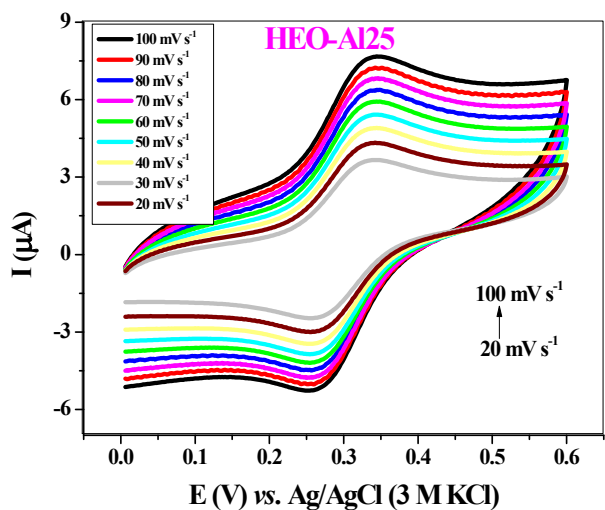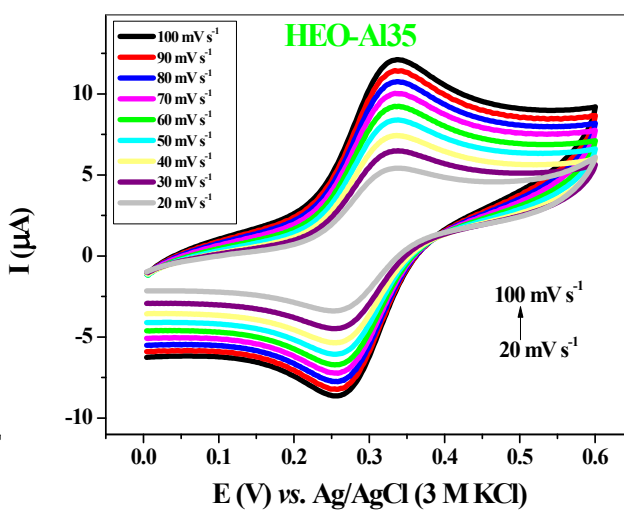

**Figure S2.** CV response of all HEO-modified GC electrode in 1 M KCl+5 mM potassium ferricyanide redox couple at 20-100 mVs<sup>-1</sup> scan rate.

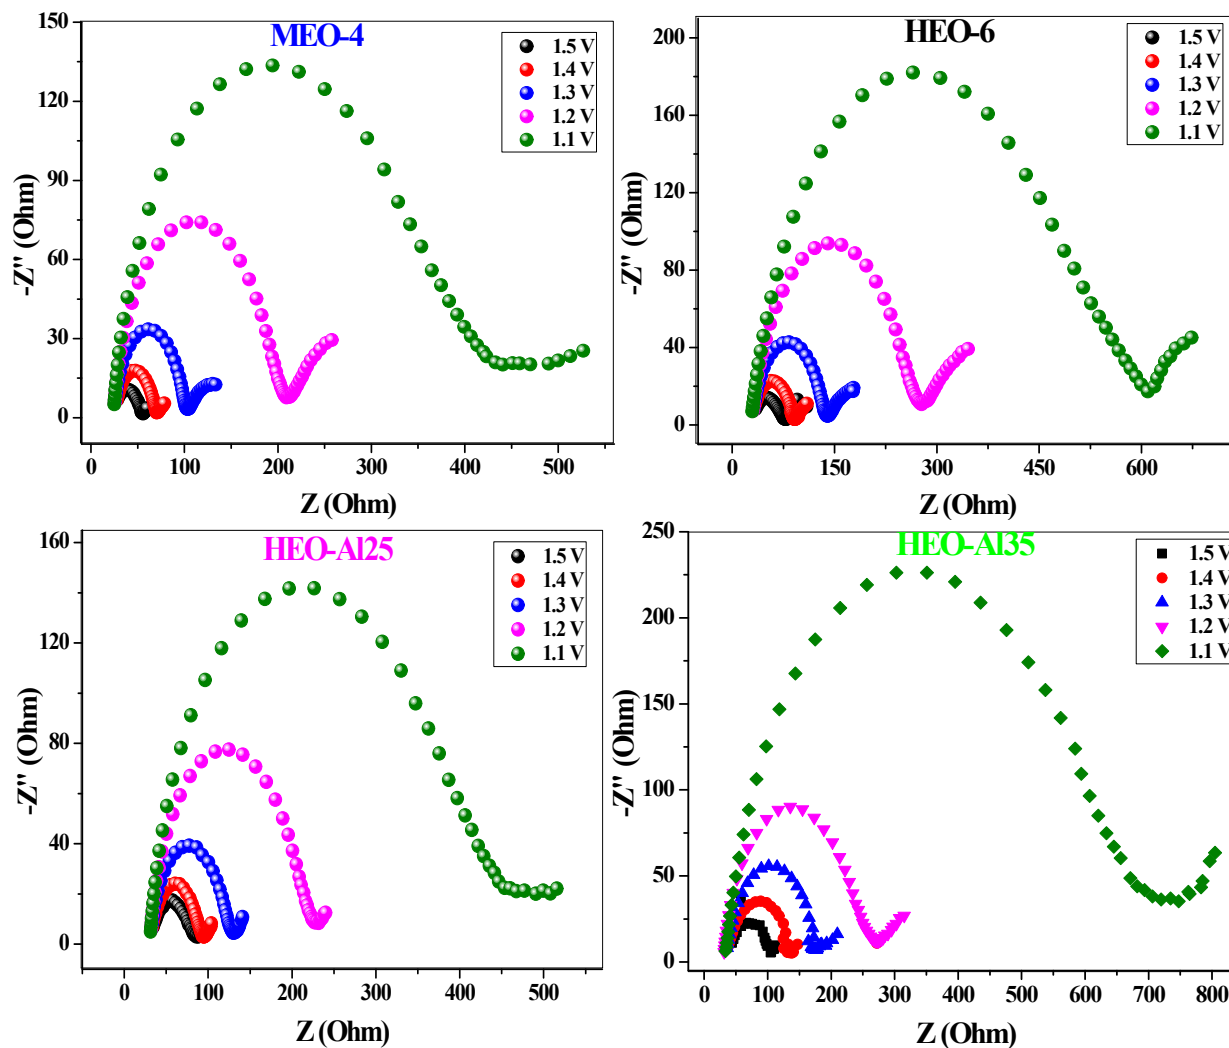

12

13

14 **Figure S3.** Nyquist plots of all HEOs-modified GC electrode at 1.1-1.5 V applied DC voltage.

15

16

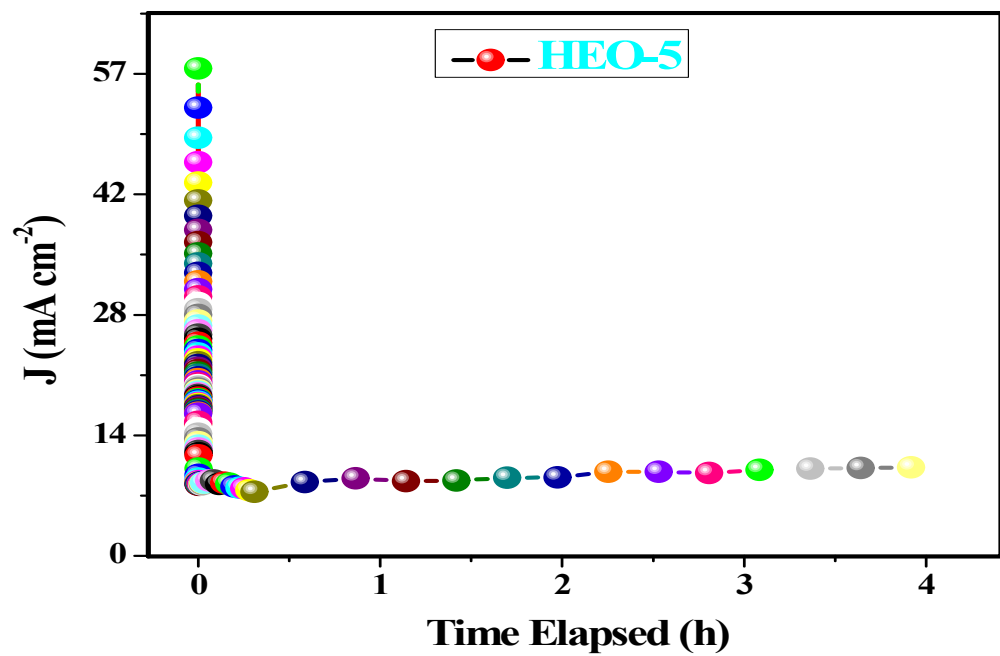

17

18 **Figure S4.** Chronoamperometric response of HEO-5 modified GC electrode in 1 M KOH  
19 recorded for 4 h.

20

21
